# Supplementary material for: The effects of meliponicultural use of Tetragonula laeviceps on other bee pollinators and pollination efficacy of lemon
Source: PeerJ. 2024 Jun 28;12:e17655. doi: 10.7717/peerj.17655 (PMC11216206; doi:10.7717/peerj.17655)
Supplement: Supplemental Information 1 [file peerj-12-17655-s001.xlsx]

## Sheet: Relative abundance
Relative abundance of insect pollinators
Pollinator	Relative abundance	Treatment
T. laeviceps	0	without meliponiculure (I)
A. cerana	56.58	without meliponiculure (I)
L. albescens	23.11	without meliponiculure (I)
M. laticeps	8.02	without meliponiculure (I)
X. confusa	4.63	without meliponiculure (I)
X. latipes	3.47	without meliponiculure (I)
X. caerulea	2.89	without meliponiculure (I)
D. thoracicus	0.67	without meliponiculure (I)
P. demoleus	0.21	without meliponiculure (I)
D. belisama	0.18	without meliponiculure (I)
H. misippus	0.15	without meliponiculure (I)
T. laeviceps	0	without meliponiculure (I)
A. cerana	55.4484	without meliponiculure (I)
L. albescens	22.6478	without meliponiculure (I)
M. laticeps	7.8596	without meliponiculure (I)
X. confusa	4.5374	without meliponiculure (I)
X. latipes	3.4006	without meliponiculure (I)
X. caerulea	2.8322	without meliponiculure (I)
D. thoracicus	0.6566	without meliponiculure (I)
P. demoleus	0.2058	without meliponiculure (I)
D. belisama	0.1764	without meliponiculure (I)
H. misippus	0.147	without meliponiculure (I)
T. laeviceps	0	without meliponiculure (I)
A. cerana	54.3168	without meliponiculure (I)
L. albescens	22.1856	without meliponiculure (I)
M. laticeps	7.6992	without meliponiculure (I)
X. confusa	4.4448	without meliponiculure (I)
X. latipes	3.3312	without meliponiculure (I)
X. caerulea	2.7744	without meliponiculure (I)
D. thoracicus	0.6432	without meliponiculure (I)
P. demoleus	0.2016	without meliponiculure (I)
D. belisama	0.1728	without meliponiculure (I)
H. misippus	0.144	without meliponiculure (I)
T. laeviceps	0	without meliponiculure (I)
A. cerana	56.8063	without meliponiculure (I)
L. albescens	23.2024	without meliponiculure (I)
M. laticeps	8.05208	without meliponiculure (I)
X. confusa	4.64852	without meliponiculure (I)
X. latipes	3.48388	without meliponiculure (I)
X. caerulea	2.90156	without meliponiculure (I)
D. thoracicus	0.67268	without meliponiculure (I)
P. demoleus	0.21084	without meliponiculure (I)
D. belisama	0.18072	without meliponiculure (I)
H. misippus	0.1506	without meliponiculure (I)
T. laeviceps	42.17	with meliponiculure (II)
A. cerana	30.1	with meliponiculure (II)
L. albescens	14.11	with meliponiculure (II)
M. laticeps	6.44	with meliponiculure (II)
X. confusa	2.44	with meliponiculure (II)
X. latipes	1.62	with meliponiculure (II)
X. caerulea	2.01	with meliponiculure (II)
D. thoracicus	0.68	with meliponiculure (II)
P. demoleus	0.21	with meliponiculure (II)
D. belisama	0.17	with meliponiculure (II)
H. misippus	0.15	with meliponiculure (II)
T. laeviceps	43.4351	with meliponiculure (II)
A. cerana	31.003	with meliponiculure (II)
L. albescens	14.5333	with meliponiculure (II)
M. laticeps	6.6332	with meliponiculure (II)
X. confusa	2.5132	with meliponiculure (II)
X. latipes	1.67	with meliponiculure (II)
X. caerulea	2.0703	with meliponiculure (II)
D. thoracicus	0.7004	with meliponiculure (II)
P. demoleus	0.2163	with meliponiculure (II)
D. belisama	0.1751	with meliponiculure (II)
H. misippus	0.1545	with meliponiculure (II)
T. laeviceps	40.9049	with meliponiculure (II)
A. cerana	29.197	with meliponiculure (II)
L. albescens	13.6867	with meliponiculure (II)
M. laticeps	6.2468	with meliponiculure (II)
X. confusa	2.3668	with meliponiculure (II)
X. latipes	1.72	with meliponiculure (II)
X. caerulea	1.9497	with meliponiculure (II)
D. thoracicus	0.6596	with meliponiculure (II)
P. demoleus	0.2037	with meliponiculure (II)
D. belisama	0.1649	with meliponiculure (II)
H. misippus	0.1455	with meliponiculure (II)
T. laeviceps	44.7002	with meliponiculure (II)
A. cerana	31.906	with meliponiculure (II)
L. albescens	14.9566	with meliponiculure (II)
M. laticeps	6.8264	with meliponiculure (II)
X. confusa	2.5864	with meliponiculure (II)
X. latipes	1.69	with meliponiculure (II)
X. caerulea	2.1306	with meliponiculure (II)
D. thoracicus	0.7208	with meliponiculure (II)
P. demoleus	0.2226	with meliponiculure (II)
D. belisama	0.1802	with meliponiculure (II)
H. misippus	0.159	with meliponiculure (II)
T. laeviceps	41.66	with meliponiculure (I)
A. cerana	30.85	with meliponiculure (I)
L. albescens	13.38	with meliponiculure (I)
M. laticeps	6.64	with meliponiculure (I)
X. confusa	2.53	with meliponiculure (I)
X. latipes	1.72	with meliponiculure (I)
X. caerulea	2.02	with meliponiculure (I)
D. thoracicus	0.66	with meliponiculure (I)
P. demoleus	0.2	with meliponiculure (I)
D. belisama	0.18	with meliponiculure (I)
H. misippus	0.15	with meliponiculure (I)
T. laeviceps	43.743	with meliponiculure (I)
A. cerana	32.3925	with meliponiculure (I)
L. albescens	14.049	with meliponiculure (I)
M. laticeps	6.972	with meliponiculure (I)
X. confusa	2.6565	with meliponiculure (I)
X. latipes	1.806	with meliponiculure (I)
X. caerulea	2.121	with meliponiculure (I)
D. thoracicus	0.693	with meliponiculure (I)
P. demoleus	0.21	with meliponiculure (I)
D. belisama	0.189	with meliponiculure (I)
H. misippus	0.1575	with meliponiculure (I)
T. laeviceps	42.4932	with meliponiculure (I)
A. cerana	31.467	with meliponiculure (I)
L. albescens	13.6476	with meliponiculure (I)
M. laticeps	6.7728	with meliponiculure (I)
X. confusa	2.5806	with meliponiculure (I)
X. latipes	1.7544	with meliponiculure (I)
X. caerulea	2.0604	with meliponiculure (I)
D. thoracicus	0.6732	with meliponiculure (I)
P. demoleus	0.204	with meliponiculure (I)
D. belisama	0.1836	with meliponiculure (I)
H. misippus	0.153	with meliponiculure (I)
T. laeviceps	40.4102	with meliponiculure (I)
A. cerana	29.9245	with meliponiculure (I)
L. albescens	12.9786	with meliponiculure (I)
M. laticeps	6.4408	with meliponiculure (I)
X. confusa	2.4541	with meliponiculure (I)
X. latipes	1.6684	with meliponiculure (I)
X. caerulea	1.9594	with meliponiculure (I)
D. thoracicus	0.6402	with meliponiculure (I)
P. demoleus	0.194	with meliponiculure (I)
D. belisama	0.1746	with meliponiculure (I)
H. misippus	0.1455	with meliponiculure (I)

## Sheet: Daily foraging activity
Daily foraging activity of bees pollinators
Hour	Pollinator	Number of bees	Treatment
7	T. laeviceps	0	Without (I)
7	A. cerana	7.875	Without (I)
7	L. albescens	3	Without (I)
7	M. laticeps	0.425	Without (I)
7	X. confusa	0.375	Without (I)
7	X. latipes	0.375	Without (I)
7	X. caerulea	0.234	Without (I)
8	T. laeviceps	0	Without (I)
8	A. cerana	11.875	Without (I)
8	L. albescens	4.625	Without (I)
8	M. laticeps	1	Without (I)
8	X. confusa	1	Without (I)
8	X. latipes	0.75	Without (I)
8	X. caerulea	0.5	Without (I)
9	T. laeviceps	0	Without (I)
9	A. cerana	16.78	Without (I)
9	L. albescens	7.625	Without (I)
9	M. laticeps	2.125	Without (I)
9	X. confusa	1.25	Without (I)
9	X. latipes	1	Without (I)
9	X. caerulea	1	Without (I)
10	T. laeviceps	0	Without (I)
10	A. cerana	23.875	Without (I)
10	L. albescens	11.625	Without (I)
10	M. laticeps	3.625	Without (I)
10	X. confusa	1.875	Without (I)
10	X. latipes	1.625	Without (I)
10	X. caerulea	1.52	Without (I)
11	T. laeviceps	0	Without (I)
11	A. cerana	27.125	Without (I)
11	L. albescens	10.25	Without (I)
11	M. laticeps	4.125	Without (I)
11	X. confusa	2.125	Without (I)
11	X. latipes	1.5	Without (I)
11	X. caerulea	1.5	Without (I)
12	T. laeviceps	0	Without (I)
12	A. cerana	24.125	Without (I)
12	L. albescens	7.375	Without (I)
12	M. laticeps	3.375	Without (I)
12	X. confusa	1.625	Without (I)
12	X. latipes	1.625	Without (I)
12	X. caerulea	1.625	Without (I)
13	T. laeviceps	0	Without (I)
13	A. cerana	12.25	Without (I)
13	L. albescens	6.375	Without (I)
13	M. laticeps	2.25	Without (I)
13	X. confusa	1.125	Without (I)
13	X. latipes	0.5	Without (I)
13	X. caerulea	0.5	Without (I)
14	T. laeviceps	0	Without (I)
14	A. cerana	8.75	Without (I)
14	L. albescens	3.25	Without (I)
14	M. laticeps	1.5	Without (I)
14	X. confusa	1	Without (I)
14	X. latipes	0.625	Without (I)
14	X. caerulea	0.625	Without (I)
15	T. laeviceps	0	Without (I)
15	A. cerana	4.375	Without (I)
15	L. albescens	1.25	Without (I)
15	M. laticeps	0.625	Without (I)
15	X. confusa	0.625	Without (I)
15	X. latipes	0.25	Without (I)
15	X. caerulea	0.25	Without (I)
7	T. laeviceps	5.08333	With (I)
7	A. cerana	8.08333	With (I)
7	L. albescens	3.25	With (I)
7	M. laticeps	0.333333	With (I)
7	X. confusa	0.12	With (I)
7	X. latipes	0.132	With (I)
7	X. caerulea	0.13	With (I)
8	T. laeviceps	13.9167	With (I)
8	A. cerana	10.75	With (I)
8	L. albescens	4.58333	With (I)
8	M. laticeps	2.08333	With (I)
8	X. confusa	0.833333	With (I)
8	X. latipes	0.366667	With (I)
8	X. caerulea	0.416667	With (I)
9	T. laeviceps	19.1667	With (I)
9	A. cerana	13.4167	With (I)
9	L. albescens	6.08333	With (I)
9	M. laticeps	3.16667	With (I)
9	X. confusa	1.08333	With (I)
9	X. latipes	0.833333	With (I)
9	X. caerulea	0.75	With (I)
10	T. laeviceps	23.5833	With (I)
10	A. cerana	15.9167	With (I)
10	L. albescens	7.5	With (I)
10	M. laticeps	4.16667	With (I)
10	X. confusa	1.41667	With (I)
10	X. latipes	1.25	With (I)
10	X. caerulea	1.23	With (I)
11	T. laeviceps	27.9167	With (I)
11	A. cerana	20.75	With (I)
11	L. albescens	8.83333	With (I)
11	M. laticeps	4.83333	With (I)
11	X. confusa	1.83333	With (I)
11	X. latipes	1.41667	With (I)
11	X. caerulea	1.41667	With (I)
12	T. laeviceps	24.5833	With (I)
12	A. cerana	17.25	With (I)
12	L. albescens	7.83333	With (I)
12	M. laticeps	4.08333	With (I)
12	X. confusa	1.75	With (I)
12	X. latipes	1.16667	With (I)
12	X. caerulea	1.16667	With (I)
13	T. laeviceps	17.9167	With (I)
13	A. cerana	11.9167	With (I)
13	L. albescens	5.33333	With (I)
13	M. laticeps	2.75	With (I)
13	X. confusa	1.08333	With (I)
13	X. latipes	0.583333	With (I)
13	X. caerulea	0.583333	With (I)
14	T. laeviceps	13.1667	With (I)
14	A. cerana	7.25	With (I)
14	L. albescens	3.58333	With (I)
14	M. laticeps	2	With (I)
14	X. confusa	0.916667	With (I)
14	X. latipes	0.42	With (I)
14	X. caerulea	0.42	With (I)
15	T. laeviceps	9.16667	With (I)
15	A. cerana	4.41667	With (I)
15	L. albescens	1.83333	With (I)
15	M. laticeps	0.75	With (I)
15	X. confusa	0.25	With (I)
15	X. latipes	0.183333	With (I)
15	X. caerulea	0.183333	With (I)
7	T. laeviceps	5.10875	With (II)
7	A. cerana	8.11567	With (II)
7	L. albescens	3.25975	With (II)
7	M. laticeps	0.334	With (II)
7	X. confusa	0.12036	With (II)
7	X. latipes	0.132396	With (II)
7	X. caerulea	0.132396	With (II)
8	T. laeviceps	13.9862	With (II)
8	A. cerana	10.793	With (II)
8	L. albescens	4.59708	With (II)
8	M. laticeps	2.0875	With (II)
8	X. confusa	0.835833	With (II)
8	X. latipes	0.367767	With (II)
8	X. caerulea	0.417917	With (II)
9	T. laeviceps	19.2625	With (II)
9	A. cerana	13.4703	With (II)
9	L. albescens	6.10158	With (II)
9	M. laticeps	3.173	With (II)
9	X. confusa	1.08658	With (II)
9	X. latipes	0.835833	With (II)
9	X. caerulea	0.75225	With (II)
10	T. laeviceps	23.7012	With (II)
10	A. cerana	15.9803	With (II)
10	L. albescens	7.5225	With (II)
10	M. laticeps	4.175	With (II)
10	X. confusa	1.42092	With (II)
10	X. latipes	1.25375	With (II)
10	X. caerulea	1.25375	With (II)
11	T. laeviceps	28.0563	With (II)
11	A. cerana	20.833	With (II)
11	L. albescens	8.85983	With (II)
11	M. laticeps	4.843	With (II)
11	X. confusa	1.83883	With (II)
11	X. latipes	1.42092	With (II)
11	X. caerulea	1.5045	With (II)
12	T. laeviceps	24.7062	With (II)
12	A. cerana	17.319	With (II)
12	L. albescens	7.85683	With (II)
12	M. laticeps	4.0915	With (II)
12	X. confusa	1.75525	With (II)
12	X. latipes	1.17017	With (II)
12	X. caerulea	1.17017	With (II)
13	T. laeviceps	18.0062	With (II)
13	A. cerana	11.9643	With (II)
13	L. albescens	5.34933	With (II)
13	M. laticeps	2.7555	With (II)
13	X. confusa	1.08658	With (II)
13	X. latipes	0.585083	With (II)
13	X. caerulea	0.585083	With (II)
14	T. laeviceps	13.2325	With (II)
14	A. cerana	7.279	With (II)
14	L. albescens	3.59408	With (II)
14	M. laticeps	2.004	With (II)
14	X. confusa	0.919417	With (II)
14	X. latipes	0.42126	With (II)
14	X. caerulea	0.334333	With (II)
15	T. laeviceps	9.2125	With (II)
15	A. cerana	4.43433	With (II)
15	L. albescens	1.83883	With (II)
15	M. laticeps	0.7515	With (II)
15	X. confusa	0.25075	With (II)
15	X. latipes	0.183883	With (II)
15	X. caerulea	0.183883	With (II)
7	T. laeviceps	0	Without (I)
7	A. cerana	7.89862	Without (I)
7	L. albescens	3.009	Without (I)
7	M. laticeps	0.426275	Without (I)
7	X. confusa	0.376125	Without (I)
7	X. latipes	0.376125	Without (I)
7	X. caerulea	0.234702	Without (I)
8	T. laeviceps	0	Without (I)
8	A. cerana	11.9106	Without (I)
8	L. albescens	4.63887	Without (I)
8	M. laticeps	1.003	Without (I)
8	X. confusa	1.003	Without (I)
8	X. latipes	0.75225	Without (I)
8	X. caerulea	0.5015	Without (I)
9	T. laeviceps	0	Without (I)
9	A. cerana	16.8303	Without (I)
9	L. albescens	7.64787	Without (I)
9	M. laticeps	2.13137	Without (I)
9	X. confusa	1.25375	Without (I)
9	X. latipes	1.003	Without (I)
9	X. caerulea	1.003	Without (I)
10	T. laeviceps	0	Without (I)
10	A. cerana	23.9466	Without (I)
10	L. albescens	11.6599	Without (I)
10	M. laticeps	3.63587	Without (I)
10	X. confusa	1.88062	Without (I)
10	X. latipes	1.62987	Without (I)
10	X. caerulea	1.5045	Without (I)
11	T. laeviceps	0	Without (I)
11	A. cerana	27.2064	Without (I)
11	L. albescens	10.2807	Without (I)
11	M. laticeps	4.13737	Without (I)
11	X. confusa	2.13137	Without (I)
11	X. latipes	1.5045	Without (I)
11	X. caerulea	1.5045	Without (I)
12	T. laeviceps	0	Without (I)
12	A. cerana	24.1974	Without (I)
12	L. albescens	7.39712	Without (I)
12	M. laticeps	3.38512	Without (I)
12	X. confusa	1.62987	Without (I)
12	X. latipes	1.62987	Without (I)
12	X. caerulea	1.6	Without (I)
13	T. laeviceps	0	Without (I)
13	A. cerana	12.2867	Without (I)
13	L. albescens	6.39412	Without (I)
13	M. laticeps	2.25675	Without (I)
13	X. confusa	1.12837	Without (I)
13	X. latipes	0.5015	Without (I)
13	X. caerulea	0.5015	Without (I)
14	T. laeviceps	0	Without (I)
14	A. cerana	8.77625	Without (I)
14	L. albescens	3.25975	Without (I)
14	M. laticeps	1.5045	Without (I)
14	X. confusa	1.003	Without (I)
14	X. latipes	0.626875	Without (I)
14	X. caerulea	0.626875	Without (I)
15	T. laeviceps	0	Without (I)
15	A. cerana	4.38812	Without (I)
15	L. albescens	1.25375	Without (I)
15	M. laticeps	0.626875	Without (I)
15	X. confusa	0.626875	Without (I)
15	X. latipes	0.25075	Without (I)
15	X. caerulea	0.25075	Without (I)
7	T. laeviceps	5.09858	With (I)
7	A. cerana	8.10758	With (I)
7	L. albescens	3.25975	With (I)
7	M. laticeps	0.334333	With (I)
7	X. confusa	0.12036	With (I)
7	X. latipes	0.132396	With (I)
7	X. caerulea	0.132396	With (I)
8	T. laeviceps	13.9584	With (I)
8	A. cerana	10.7822	With (I)
8	L. albescens	4.59708	With (I)
8	M. laticeps	2.08958	With (I)
8	X. confusa	0.835833	With (I)
8	X. latipes	0.367767	With (I)
8	X. caerulea	0.417917	With (I)
9	T. laeviceps	19.2242	With (I)
9	A. cerana	13.4569	With (I)
9	L. albescens	6.10158	With (I)
9	M. laticeps	3.17617	With (I)
9	X. confusa	1.08658	With (I)
9	X. latipes	0.835833	With (I)
9	X. caerulea	0.75225	With (I)
10	T. laeviceps	23.6541	With (I)
10	A. cerana	15.9644	With (I)
10	L. albescens	7.5225	With (I)
10	M. laticeps	4.17917	With (I)
10	X. confusa	1.42092	With (I)
10	X. latipes	1.25375	With (I)
10	X. caerulea	1.25	With (I)
11	T. laeviceps	28.0004	With (I)
11	A. cerana	20.8122	With (I)
11	L. albescens	8.85983	With (I)
11	M. laticeps	4.84783	With (I)
11	X. confusa	1.83883	With (I)
11	X. latipes	1.42092	With (I)
11	X. caerulea	1.41	With (I)
12	T. laeviceps	24.6571	With (I)
12	A. cerana	17.3017	With (I)
12	L. albescens	7.85683	With (I)
12	M. laticeps	4.09558	With (I)
12	X. confusa	1.75525	With (I)
12	X. latipes	1.17017	With (I)
12	X. caerulea	1.17017	With (I)
13	T. laeviceps	17.9704	With (I)
13	A. cerana	11.9524	With (I)
13	L. albescens	5.34933	With (I)
13	M. laticeps	2.75825	With (I)
13	X. confusa	1.08658	With (I)
13	X. latipes	0.585083	With (I)
13	X. caerulea	0.585083	With (I)
14	T. laeviceps	13.2062	With (I)
14	A. cerana	7.27175	With (I)
14	L. albescens	3.59408	With (I)
14	M. laticeps	2.006	With (I)
14	X. confusa	0.919417	With (I)
14	X. latipes	0.42126	With (I)
14	X. caerulea	0.42126	With (I)
15	T. laeviceps	9.19417	With (I)
15	A. cerana	4.42992	With (I)
15	L. albescens	1.83883	With (I)
15	M. laticeps	0.75225	With (I)
15	X. confusa	0.25075	With (I)
15	X. latipes	0.183883	With (I)
15	X. caerulea	0.183883	With (I)
7	T. laeviceps	5.08321	With (II)
7	A. cerana	8.07509	With (II)
7	L. albescens	3.24345	With (II)
7	M. laticeps	0.33233	With (II)
7	X. confusa	0.119758	With (II)
7	X. latipes	0.131734	With (II)
7	X. caerulea	0.131734	With (II)
8	T. laeviceps	13.9163	With (II)
8	A. cerana	10.739	With (II)
8	L. albescens	4.5741	With (II)
8	M. laticeps	2.07706	With (II)
8	X. confusa	0.831654	With (II)
8	X. latipes	0.365928	With (II)
8	X. caerulea	0.415827	With (II)
9	T. laeviceps	19.1662	With (II)
9	A. cerana	13.403	With (II)
9	L. albescens	6.07108	With (II)
9	M. laticeps	3.15714	With (II)
9	X. confusa	1.08115	With (II)
9	X. latipes	0.831654	With (II)
9	X. caerulea	0.748489	With (II)
10	T. laeviceps	23.5827	With (II)
10	A. cerana	15.9004	With (II)
10	L. albescens	7.48489	With (II)
10	M. laticeps	4.15413	With (II)
10	X. confusa	1.41381	With (II)
10	X. latipes	1.24748	With (II)
10	X. caerulea	1.24748	With (II)
11	T. laeviceps	27.916	With (II)
11	A. cerana	20.7288	With (II)
11	L. albescens	8.81553	With (II)
11	M. laticeps	4.81879	With (II)
11	X. confusa	1.82964	With (II)
11	X. latipes	1.41381	With (II)
11	X. caerulea	1.49698	With (II)
12	T. laeviceps	24.5827	With (II)
12	A. cerana	17.2324	With (II)
12	L. albescens	7.81755	With (II)
12	M. laticeps	4.07104	With (II)
12	X. confusa	1.74647	With (II)
12	X. latipes	1.16432	With (II)
12	X. caerulea	1.16432	With (II)
13	T. laeviceps	17.9162	With (II)
13	A. cerana	11.9045	With (II)
13	L. albescens	5.32259	With (II)
13	M. laticeps	2.74172	With (II)
13	X. confusa	1.08115	With (II)
13	X. latipes	0.582158	With (II)
13	X. caerulea	0.582158	With (II)
14	T. laeviceps	13.1663	With (II)
14	A. cerana	7.24261	With (II)
14	L. albescens	3.57611	With (II)
14	M. laticeps	1.99398	With (II)
14	X. confusa	0.91482	With (II)
14	X. latipes	0.419154	With (II)
14	X. caerulea	0.332662	With (II)
15	T. laeviceps	9.16644	With (II)
15	A. cerana	4.41216	With (II)
15	L. albescens	1.82964	With (II)
15	M. laticeps	0.747743	With (II)
15	X. confusa	0.249496	With (II)
15	X. latipes	0.182964	With (II)
15	X. caerulea	0.182964	With (II)
7	T. laeviceps	0	Without (I)
7	A. cerana	7.91437	Without (I)
7	L. albescens	3.015	Without (I)
7	M. laticeps	0.427125	Without (I)
7	X. confusa	0.376875	Without (I)
7	X. latipes	0.376875	Without (I)
7	X. caerulea	0.23517	Without (I)
8	T. laeviceps	0	Without (I)
8	A. cerana	11.9344	Without (I)
8	L. albescens	4.64812	Without (I)
8	M. laticeps	1.005	Without (I)
8	X. confusa	1.005	Without (I)
8	X. latipes	0.75375	Without (I)
8	X. caerulea	0.5025	Without (I)
9	T. laeviceps	0	Without (I)
9	A. cerana	16.8639	Without (I)
9	L. albescens	7.66312	Without (I)
9	M. laticeps	2.13562	Without (I)
9	X. confusa	1.25625	Without (I)
9	X. latipes	1.005	Without (I)
9	X. caerulea	1.005	Without (I)
10	T. laeviceps	0	Without (I)
10	A. cerana	23.9944	Without (I)
10	L. albescens	11.6831	Without (I)
10	M. laticeps	3.64312	Without (I)
10	X. confusa	1.88437	Without (I)
10	X. latipes	1.63312	Without (I)
10	X. caerulea	1.5075	Without (I)
11	T. laeviceps	0	Without (I)
11	A. cerana	27.2606	Without (I)
11	L. albescens	10.3012	Without (I)
11	M. laticeps	4.14562	Without (I)
11	X. confusa	2.13562	Without (I)
11	X. latipes	1.5075	Without (I)
11	X. caerulea	1.5075	Without (I)
12	T. laeviceps	0	Without (I)
12	A. cerana	24.2456	Without (I)
12	L. albescens	7.41187	Without (I)
12	M. laticeps	3.39187	Without (I)
12	X. confusa	1.63312	Without (I)
12	X. latipes	1.63312	Without (I)
12	X. caerulea	1.63312	Without (I)
13	T. laeviceps	0	Without (I)
13	A. cerana	12.3112	Without (I)
13	L. albescens	6.40687	Without (I)
13	M. laticeps	2.26125	Without (I)
13	X. confusa	1.13062	Without (I)
13	X. latipes	0.5025	Without (I)
13	X. caerulea	0.5025	Without (I)
14	T. laeviceps	0	Without (I)
14	A. cerana	8.79375	Without (I)
14	L. albescens	3.26625	Without (I)
14	M. laticeps	1.5075	Without (I)
14	X. confusa	1.005	Without (I)
14	X. latipes	0.628125	Without (I)
14	X. caerulea	0.628125	Without (I)
15	T. laeviceps	0	Without (I)
15	A. cerana	4.39687	Without (I)
15	L. albescens	1.25625	Without (I)
15	M. laticeps	0.628125	Without (I)
15	X. confusa	0.628125	Without (I)
15	X. latipes	0.25125	Without (I)
15	X. caerulea	0.25125	Without (I)
7	T. laeviceps	5.10875	With (I)
7	A. cerana	8.12375	With (I)
7	L. albescens	3.26625	With (I)
7	M. laticeps	0.335	With (I)
7	X. confusa	0.1206	With (I)
7	X. latipes	0.13266	With (I)
7	X. caerulea	0.13266	With (I)
8	T. laeviceps	13.9862	With (I)
8	A. cerana	10.8037	With (I)
8	L. albescens	4.60625	With (I)
8	M. laticeps	2.09375	With (I)
8	X. confusa	0.8375	With (I)
8	X. latipes	0.3685	With (I)
8	X. caerulea	0.3685	With (I)
9	T. laeviceps	19.2625	With (I)
9	A. cerana	13.4837	With (I)
9	L. albescens	6.11375	With (I)
9	M. laticeps	3.1825	With (I)
9	X. confusa	1.08875	With (I)
9	X. latipes	0.8375	With (I)
9	X. caerulea	0.8375	With (I)
10	T. laeviceps	23.7012	With (I)
10	A. cerana	15.9962	With (I)
10	L. albescens	7.5375	With (I)
10	M. laticeps	4.1875	With (I)
10	X. confusa	1.42375	With (I)
10	X. latipes	1.25625	With (I)
10	X. caerulea	1.213	With (I)
11	T. laeviceps	28.0563	With (I)
11	A. cerana	20.8537	With (I)
11	L. albescens	8.8775	With (I)
11	M. laticeps	4.8575	With (I)
11	X. confusa	1.8425	With (I)
11	X. latipes	1.42375	With (I)
11	X. caerulea	1.42375	With (I)
12	T. laeviceps	24.7062	With (I)
12	A. cerana	17.3362	With (I)
12	L. albescens	7.8725	With (I)
12	M. laticeps	4.10375	With (I)
12	X. confusa	1.75875	With (I)
12	X. latipes	1.1725	With (I)
12	X. caerulea	1.1725	With (I)
13	T. laeviceps	18.0062	With (I)
13	A. cerana	11.9762	With (I)
13	L. albescens	5.36	With (I)
13	M. laticeps	2.76375	With (I)
13	X. confusa	1.08875	With (I)
13	X. latipes	0.58625	With (I)
13	X. caerulea	0.58625	With (I)
14	T. laeviceps	13.2325	With (I)
14	A. cerana	7.28625	With (I)
14	L. albescens	3.60125	With (I)
14	M. laticeps	2.01	With (I)
14	X. confusa	0.92125	With (I)
14	X. latipes	0.4221	With (I)
14	X. caerulea	0.4221	With (I)
15	T. laeviceps	9.2125	With (I)
15	A. cerana	4.43875	With (I)
15	L. albescens	1.8425	With (I)
15	M. laticeps	0.75375	With (I)
15	X. confusa	0.25125	With (I)
15	X. latipes	0.18425	With (I)
15	X. caerulea	0.18475	With (I)
7	T. laeviceps	5.09853	With (II)
7	A. cerana	8.09944	With (II)
7	L. albescens	3.25323	With (II)
7	M. laticeps	0.333332	With (II)
7	X. confusa	0.120119	With (II)
7	X. latipes	0.132131	With (II)
7	X. caerulea	0.132131	With (II)
8	T. laeviceps	13.9583	With (II)
8	A. cerana	10.7714	With (II)
8	L. albescens	4.58789	With (II)
8	M. laticeps	2.08333	With (II)
8	X. confusa	0.834162	With (II)
8	X. latipes	0.367031	With (II)
8	X. caerulea	0.417081	With (II)
9	T. laeviceps	19.224	With (II)
9	A. cerana	13.4434	With (II)
9	L. albescens	6.08938	With (II)
9	M. laticeps	3.16665	With (II)
9	X. confusa	1.08441	With (II)
9	X. latipes	0.834162	With (II)
9	X. caerulea	0.750745	With (II)
10	T. laeviceps	23.6538	With (II)
10	A. cerana	15.9484	With (II)
10	L. albescens	7.50745	With (II)
10	M. laticeps	4.16665	With (II)
10	X. confusa	1.41807	With (II)
10	X. latipes	1.25124	With (II)
10	X. caerulea	1.25124	With (II)
11	T. laeviceps	28.0001	With (II)
11	A. cerana	20.7913	With (II)
11	L. albescens	8.84211	With (II)
11	M. laticeps	4.83331	With (II)
11	X. confusa	1.83516	With (II)
11	X. latipes	1.41807	With (II)
11	X. caerulea	1.50149	With (II)
12	T. laeviceps	24.6568	With (II)
12	A. cerana	17.2844	With (II)
12	L. albescens	7.84112	With (II)
12	M. laticeps	4.08332	With (II)
12	X. confusa	1.75174	With (II)
12	X. latipes	1.16783	With (II)
12	X. caerulea	1.16783	With (II)
13	T. laeviceps	17.9702	With (II)
13	A. cerana	11.9404	With (II)
13	L. albescens	5.33863	With (II)
13	M. laticeps	2.74999	With (II)
13	X. confusa	1.08441	With (II)
13	X. latipes	0.583913	With (II)
13	X. caerulea	0.583913	With (II)
14	T. laeviceps	13.206	With (II)
14	A. cerana	7.26444	With (II)
14	L. albescens	3.5869	With (II)
14	M. laticeps	1.99999	With (II)
14	X. confusa	0.917578	With (II)
14	X. latipes	0.420417	With (II)
14	X. caerulea	0.333665	With (II)
15	T. laeviceps	9.19407	With (II)
15	A. cerana	4.42546	With (II)
15	L. albescens	1.83516	With (II)
15	M. laticeps	0.749997	With (II)
15	X. confusa	0.250248	With (II)
15	X. latipes	0.183516	With (II)
15	X. caerulea	0.183516	With (II)
7	T. laeviceps	0	Without (I)
7	A. cerana	7.83563	Without (I)
7	L. albescens	2.985	Without (I)
7	M. laticeps	0.422875	Without (I)
7	X. confusa	0.39	Without (I)
7	X. latipes	0.373125	Without (I)
7	X. caerulea	0.36	Without (I)
8	T. laeviceps	0	Without (I)
8	A. cerana	11.8156	Without (I)
8	L. albescens	4.60187	Without (I)
8	M. laticeps	0.995	Without (I)
8	X. confusa	0.995	Without (I)
8	X. latipes	1	Without (I)
8	X. caerulea	1	Without (I)
9	T. laeviceps	0	Without (I)
9	A. cerana	16.6961	Without (I)
9	L. albescens	7.58688	Without (I)
9	M. laticeps	2.11437	Without (I)
9	X. confusa	1.24375	Without (I)
9	X. latipes	0.995	Without (I)
9	X. caerulea	0.995	Without (I)
10	T. laeviceps	0	Without (I)
10	A. cerana	23.7556	Without (I)
10	L. albescens	11.5669	Without (I)
10	M. laticeps	3.60688	Without (I)
10	X. confusa	1.86563	Without (I)
10	X. latipes	1.61688	Without (I)
10	X. caerulea	1.61	Without (I)
11	T. laeviceps	0	Without (I)
11	A. cerana	26.9894	Without (I)
11	L. albescens	10.1988	Without (I)
11	M. laticeps	4.10438	Without (I)
11	X. confusa	2.11437	Without (I)
11	X. latipes	1.4925	Without (I)
11	X. caerulea	1.4925	Without (I)
12	T. laeviceps	0	Without (I)
12	A. cerana	24.0044	Without (I)
12	L. albescens	7.33812	Without (I)
12	M. laticeps	3.35812	Without (I)
12	X. confusa	1.82688	Without (I)
12	X. latipes	1.61688	Without (I)
12	X. caerulea	1.61688	Without (I)
13	T. laeviceps	0	Without (I)
13	A. cerana	12.1888	Without (I)
13	L. albescens	6.34312	Without (I)
13	M. laticeps	2.23875	Without (I)
13	X. confusa	1.11938	Without (I)
13	X. latipes	0.4975	Without (I)
13	X. caerulea	0.4975	Without (I)
14	T. laeviceps	0	Without (I)
14	A. cerana	8.70625	Without (I)
14	L. albescens	3.23375	Without (I)
14	M. laticeps	1.4925	Without (I)
14	X. confusa	0.995	Without (I)
14	X. latipes	0.628125	Without (I)
14	X. caerulea	0.618125	Without (I)
15	T. laeviceps	0	Without (I)
15	A. cerana	4.35313	Without (I)
15	L. albescens	1.24375	Without (I)
15	M. laticeps	0.621875	Without (I)
15	X. confusa	0.621875	Without (I)
15	X. latipes	0.24875	Without (I)
15	X. caerulea	0.24875	Without (I)
7	T. laeviceps	5.05792	With (I)
7	A. cerana	8.04292	With (I)
7	L. albescens	3.23375	With (I)
7	M. laticeps	0.331667	With (I)
7	X. confusa	0.1194	With (I)
7	X. latipes	0.13134	With (I)
7	X. caerulea	0.13134	With (I)
8	T. laeviceps	13.8471	With (I)
8	A. cerana	10.6962	With (I)
8	L. albescens	4.56042	With (I)
8	M. laticeps	2.07292	With (I)
8	X. confusa	0.829167	With (I)
8	X. latipes	0.364833	With (I)
8	X. caerulea	0.364583	With (I)
9	T. laeviceps	19.0708	With (I)
9	A. cerana	13.3496	With (I)
9	L. albescens	6.05292	With (I)
9	M. laticeps	3.15083	With (I)
9	X. confusa	1.07792	With (I)
9	X. latipes	0.829167	With (I)
9	X. caerulea	0.83625	With (I)
10	T. laeviceps	23.4654	With (I)
10	A. cerana	15.8371	With (I)
10	L. albescens	7.4625	With (I)
10	M. laticeps	4.14583	With (I)
10	X. confusa	1.40958	With (I)
10	X. latipes	1.24375	With (I)
10	X. caerulea	1.24	With (I)
11	T. laeviceps	27.7771	With (I)
11	A. cerana	20.6462	With (I)
11	L. albescens	8.78917	With (I)
11	M. laticeps	4.80917	With (I)
11	X. confusa	1.82417	With (I)
11	X. latipes	1.40958	With (I)
11	X. caerulea	1.4215	With (I)
12	T. laeviceps	24.4604	With (I)
12	A. cerana	17.1638	With (I)
12	L. albescens	7.79417	With (I)
12	M. laticeps	4.06292	With (I)
12	X. confusa	1.74125	With (I)
12	X. latipes	1.31608	With (I)
12	X. caerulea	1.32667	With (I)
13	T. laeviceps	17.8271	With (I)
13	A. cerana	11.8571	With (I)
13	L. albescens	5.30667	With (I)
13	M. laticeps	2.73625	With (I)
13	X. confusa	2.07792	With (I)
13	X. latipes	0.580417	With (I)
13	X. caerulea	0.580417	With (I)
14	T. laeviceps	13.1008	With (I)
14	A. cerana	7.21375	With (I)
14	L. albescens	3.56542	With (I)
14	M. laticeps	1.99	With (I)
14	X. confusa	0.912083	With (I)
14	X. latipes	0.4179	With (I)
14	X. caerulea	0.431667	With (I)
15	T. laeviceps	9.12083	With (I)
15	A. cerana	4.39458	With (I)
15	L. albescens	1.82417	With (I)
15	M. laticeps	0.74625	With (I)
15	X. confusa	0.2875	With (I)
15	X. latipes	0.18	With (I)
15	X. caerulea	0.18	With (I)
7	T. laeviceps	5.12408	With (II)
7	A. cerana	8.14001	With (II)
7	L. albescens	3.26953	With (II)
7	M. laticeps	0.335002	With (II)
7	X. confusa	0.120721	With (II)
7	X. latipes	0.132793	With (II)
7	X. caerulea	0.132793	With (II)
8	T. laeviceps	14.0282	With (II)
8	A. cerana	10.8254	With (II)
8	L. albescens	4.61087	With (II)
8	M. laticeps	2.09376	With (II)
8	X. confusa	0.838341	With (II)
8	X. latipes	0.36887	With (II)
8	X. caerulea	0.41917	With (II)
9	T. laeviceps	19.3203	With (II)
9	A. cerana	13.5107	With (II)
9	L. albescens	6.11989	With (II)
9	M. laticeps	3.18252	With (II)
9	X. confusa	1.08984	With (II)
9	X. latipes	0.838341	With (II)
9	X. caerulea	0.754507	With (II)
10	T. laeviceps	23.7724	With (II)
10	A. cerana	16.0283	With (II)
10	L. albescens	7.54507	With (II)
10	M. laticeps	4.18752	With (II)
10	X. confusa	1.42518	With (II)
10	X. latipes	1.25751	With (II)
10	X. caerulea	1.25751	With (II)
11	T. laeviceps	28.1404	With (II)
11	A. cerana	20.8955	With (II)
11	L. albescens	8.88641	With (II)
11	M. laticeps	4.85753	With (II)
11	X. confusa	1.84435	With (II)
11	X. latipes	1.42518	With (II)
11	X. caerulea	1.50901	With (II)
12	T. laeviceps	24.7804	With (II)
12	A. cerana	17.371	With (II)
12	L. albescens	7.8804	With (II)
12	M. laticeps	4.10377	With (II)
12	X. confusa	1.76052	With (II)
12	X. latipes	1.17368	With (II)
12	X. caerulea	1.17368	With (II)
13	T. laeviceps	18.0603	With (II)
13	A. cerana	12.0002	With (II)
13	L. albescens	5.36538	With (II)
13	M. laticeps	2.76377	With (II)
13	X. confusa	1.08984	With (II)
13	X. latipes	0.586839	With (II)
13	X. caerulea	0.586839	With (II)
14	T. laeviceps	13.2722	With (II)
14	A. cerana	7.30084	With (II)
14	L. albescens	3.60487	With (II)
14	M. laticeps	2.01001	With (II)
14	X. confusa	0.922175	With (II)
14	X. latipes	0.422524	With (II)
14	X. caerulea	0.335336	With (II)
15	T. laeviceps	9.24014	With (II)
15	A. cerana	4.44764	With (II)
15	L. albescens	1.84435	With (II)
15	M. laticeps	0.753754	With (II)
15	X. confusa	0.251502	With (II)
15	X. latipes	0.184435	With (II)
15	X. caerulea	0.184435	With (II)

## Sheet: Pollen load & time spent
Pollen load and time spent of bees pollinators
Pollinator	Lemon pollen	Miscellaneous pollen	Time spent
T. laeviceps	6124	127	71.32
A. cerana	84875	258	59.31
L. albescens	6213	285	62.53
M. laticeps	13125	504	45.76
X. confusa	873	278	52.74
X. latipes	867	249	54.21
X. caerulea	883	253	53.75
T. laeviceps	6307.72	130.81	74.886
A. cerana	87421.2	265.74	62.2755
L. albescens	6399.39	293.55	65.6565
M. laticeps	13518.8	519.12	48.048
X. confusa	899.19	286.34	55.377
X. latipes	893.01	256.47	56.9205
X. caerulea	909.49	260.59	56.4375
T. laeviceps	6209.74	128.778	77.0256
A. cerana	86063.2	261.612	64.0548
L. albescens	6299.98	288.99	67.5324
M. laticeps	13308.8	511.056	49.4208
X. confusa	885.222	281.892	56.9592
X. latipes	879.138	252.486	58.5468
X. caerulea	895.362	256.542	58.05
T. laeviceps	6062.76	125.73	73.4596
A. cerana	84026.2	255.42	61.0893
L. albescens	6150.87	282.15	64.4059
M. laticeps	12993.8	498.96	47.1328
X. confusa	864.27	275.22	54.3222
X. latipes	858.33	246.51	55.8363
X. caerulea	874.17	250.47	55.3625
T. laeviceps	5940.28	123.19	77.7388
A. cerana	82328.8	250.26	64.6479
L. albescens	6026.61	276.45	68.1577
M. laticeps	12731.2	488.88	49.8784
X. confusa	846.81	269.66	57.4866
X. latipes	840.99	241.53	59.0889
X. caerulea	856.51	245.41	58.5875
T. laeviceps	6001.52	124.46	71.106
A. cerana	83177.5	252.84	59.1321
L. albescens	6088.74	279.3	62.3424
M. laticeps	12862.5	493.92	45.6227
X. confusa	855.54	272.44	52.5818
X. latipes	849.66	244.02	54.0474
X. caerulea	865.34	247.94	53.5887
T. laeviceps	6062.15	125.717	70.8208
A. cerana	84017.8	255.394	58.8948
L. albescens	6150.25	282.122	62.0923
M. laticeps	12992.4	498.91	45.4397
X. confusa	864.183	275.192	52.3708
X. latipes	858.243	246.485	53.8305
X. caerulea	874.082	250.445	53.3738
T. laeviceps	6179.12	128.143	71.2487
A. cerana	85638.9	260.322	59.2507
L. albescens	6268.92	287.565	62.4675
M. laticeps	13243.1	508.536	45.7142
X. confusa	880.857	280.502	52.6873
X. latipes	874.803	251.241	54.1558
X. caerulea	890.947	255.277	53.6962
T. laeviceps	6166.87	127.889	71.213
A. cerana	85469.1	259.806	59.221
L. albescens	6256.49	286.995	62.4362
M. laticeps	13216.9	507.528	45.6914
X. confusa	879.111	279.946	52.6609
X. latipes	873.069	250.743	54.1287
X. caerulea	889.181	254.771	53.6694
T. laeviceps	6136.25	127.254	70.8208
A. cerana	85044.8	258.516	58.8948
L. albescens	6225.43	285.57	62.0923
M. laticeps	13151.2	505.008	45.4397
X. confusa	874.746	278.556	52.3708
X. latipes	868.734	249.498	53.8305
X. caerulea	884.766	253.506	53.3738
T. laeviceps	6154.62	127.635	69.1804
A. cerana	85299.4	259.29	57.5307
L. albescens	6244.06	286.425	60.6541
M. laticeps	13190.6	506.52	44.3872
X. confusa	877.365	279.39	51.1578
X. latipes	871.335	250.245	52.5837
X. caerulea	887.415	254.265	52.1375
T. laeviceps	6123.69	126.994	69.8936
A. cerana	84870.8	257.987	58.1238
L. albescens	6212.69	284.986	61.2794
M. laticeps	13124.3	503.975	44.8448
X. confusa	872.956	277.986	51.6852
X. latipes	866.957	248.988	53.1258
X. caerulea	882.956	252.987	52.675
T. laeviceps	6119.71	126.911	68.4672
A. cerana	84815.6	257.819	56.9376
L. albescens	6208.65	284.8	60.0288
M. laticeps	13115.8	503.647	43.9296
X. confusa	872.389	277.805	50.6304
X. latipes	866.393	248.826	52.0416
X. caerulea	882.382	252.823	51.6
T. laeviceps	6117.88	126.873	75.3139
A. cerana	84790.1	257.742	62.6314
L. albescens	6206.79	284.715	66.0317
M. laticeps	13111.9	503.496	48.3226
X. confusa	872.127	277.722	55.6934
X. latipes	866.133	248.751	57.2458
X. caerulea	882.117	252.747	56.76
T. laeviceps	6126.45	126.873	75.5992
A. cerana	84790.1	257.742	62.8686
L. albescens	6206.79	284.715	66.2818
M. laticeps	13111.9	503.496	48.5056
X. confusa	872.127	277.722	55.9044
X. latipes	866.133	248.751	57.4626
X. caerulea	882.117	252.747	56.975
T. laeviceps	6130.12	127.127	72.7464
A. cerana	84959.9	258.258	60.4962
L. albescens	6219.21	285.285	63.7806
M. laticeps	13138.1	504.504	46.6752
X. confusa	873.873	278.278	53.7948
X. latipes	867.867	249.249	55.2942
X. caerulea	883.883	253.253	54.825

## Sheet: Visitation rate
Pollinator visitation rates
Pollinator	Visitation	Treatment	Time
T. laeviceps	5.08333	With (I)	Morning
A. cerana	8.08333	With (I)	Morning
L. albescens	3.25	With (I)	Morning
M. laticeps	0.333333	With (I)	Morning
X. confusa	0.12	With (I)	Morning
X. latipes	0.132	With (I)	Morning
X. caerulea	0.13	With (I)	Morning
T. laeviceps	13.9167	With (I)	Morning
A. cerana	10.75	With (I)	Morning
L. albescens	4.58333	With (I)	Morning
M. laticeps	2.08333	With (I)	Morning
X. confusa	0.833333	With (I)	Morning
X. latipes	0.366667	With (I)	Morning
X. caerulea	0.416667	With (I)	Morning
T. laeviceps	19.1667	With (I)	Morning
A. cerana	13.4167	With (I)	Morning
L. albescens	6.08333	With (I)	Morning
M. laticeps	3.16667	With (I)	Morning
X. confusa	1.08333	With (I)	Morning
X. latipes	0.833333	With (I)	Morning
X. caerulea	0.75	With (I)	Morning
T. laeviceps	23.5833	With (I)	Noon
A. cerana	15.9167	With (I)	Noon
L. albescens	7.5	With (I)	Noon
M. laticeps	4.16667	With (I)	Noon
X. confusa	1.41667	With (I)	Noon
X. latipes	1.25	With (I)	Noon
X. caerulea	1.23	With (I)	Noon
T. laeviceps	27.9167	With (I)	Noon
A. cerana	20.75	With (I)	Noon
L. albescens	8.83333	With (I)	Noon
M. laticeps	4.83333	With (I)	Noon
X. confusa	1.83333	With (I)	Noon
X. latipes	1.41667	With (I)	Noon
X. caerulea	1.41667	With (I)	Noon
T. laeviceps	24.5833	With (I)	Noon
A. cerana	17.25	With (I)	Noon
L. albescens	7.83333	With (I)	Noon
M. laticeps	4.08333	With (I)	Noon
X. confusa	1.75	With (I)	Noon
X. latipes	1.16667	With (I)	Noon
X. caerulea	1.16667	With (I)	Noon
T. laeviceps	17.9167	With (I)	Afternoon
A. cerana	11.9167	With (I)	Afternoon
L. albescens	5.33333	With (I)	Afternoon
M. laticeps	2.75	With (I)	Afternoon
X. confusa	1.08333	With (I)	Afternoon
X. latipes	0.583333	With (I)	Afternoon
X. caerulea	0.583333	With (I)	Afternoon
T. laeviceps	13.1667	With (I)	Afternoon
A. cerana	7.25	With (I)	Afternoon
L. albescens	3.58333	With (I)	Afternoon
M. laticeps	2	With (I)	Afternoon
X. confusa	0.916667	With (I)	Afternoon
X. latipes	0.42	With (I)	Afternoon
X. caerulea	0.42	With (I)	Afternoon
T. laeviceps	9.16667	With (I)	Afternoon
A. cerana	4.41667	With (I)	Afternoon
L. albescens	1.83333	With (I)	Afternoon
M. laticeps	0.75	With (I)	Afternoon
X. confusa	0.25	With (I)	Afternoon
X. latipes	0.183333	With (I)	Afternoon
X. caerulea	0.183333	With (I)	Afternoon
T. laeviceps	5.10875	With (II)	Morning
A. cerana	8.11567	With (II)	Morning
L. albescens	3.25975	With (II)	Morning
M. laticeps	0.334	With (II)	Morning
X. confusa	0.12036	With (II)	Morning
X. latipes	0.132396	With (II)	Morning
X. caerulea	0.132396	With (II)	Morning
T. laeviceps	13.9862	With (II)	Morning
A. cerana	10.793	With (II)	Morning
L. albescens	4.59708	With (II)	Morning
M. laticeps	2.0875	With (II)	Morning
X. confusa	0.835833	With (II)	Morning
X. latipes	0.367767	With (II)	Morning
X. caerulea	0.417917	With (II)	Morning
T. laeviceps	19.2625	With (II)	Morning
A. cerana	13.4703	With (II)	Morning
L. albescens	6.10158	With (II)	Morning
M. laticeps	3.173	With (II)	Morning
X. confusa	1.08658	With (II)	Morning
X. latipes	0.835833	With (II)	Morning
X. caerulea	0.75225	With (II)	Morning
T. laeviceps	23.7012	With (II)	Noon
A. cerana	15.9803	With (II)	Noon
L. albescens	7.5225	With (II)	Noon
M. laticeps	4.175	With (II)	Noon
X. confusa	1.42092	With (II)	Noon
X. latipes	1.25375	With (II)	Noon
X. caerulea	1.25375	With (II)	Noon
T. laeviceps	28.0563	With (II)	Noon
A. cerana	20.833	With (II)	Noon
L. albescens	8.85983	With (II)	Noon
M. laticeps	4.843	With (II)	Noon
X. confusa	1.83883	With (II)	Noon
X. latipes	1.42092	With (II)	Noon
X. caerulea	1.5045	With (II)	Noon
T. laeviceps	24.7062	With (II)	Noon
A. cerana	17.319	With (II)	Noon
L. albescens	7.85683	With (II)	Noon
M. laticeps	4.0915	With (II)	Noon
X. confusa	1.75525	With (II)	Noon
X. latipes	1.17017	With (II)	Noon
X. caerulea	1.17017	With (II)	Noon
T. laeviceps	18.0062	With (II)	Afternoon
A. cerana	11.9643	With (II)	Afternoon
L. albescens	5.34933	With (II)	Afternoon
M. laticeps	2.7555	With (II)	Afternoon
X. confusa	1.08658	With (II)	Afternoon
X. latipes	0.585083	With (II)	Afternoon
X. caerulea	0.585083	With (II)	Afternoon
T. laeviceps	13.2325	With (II)	Afternoon
A. cerana	7.279	With (II)	Afternoon
L. albescens	3.59408	With (II)	Afternoon
M. laticeps	2.004	With (II)	Afternoon
X. confusa	0.919417	With (II)	Afternoon
X. latipes	0.42126	With (II)	Afternoon
X. caerulea	0.334333	With (II)	Afternoon
T. laeviceps	9.2125	With (II)	Afternoon
A. cerana	4.43433	With (II)	Afternoon
L. albescens	1.83883	With (II)	Afternoon
M. laticeps	0.7515	With (II)	Afternoon
X. confusa	0.25075	With (II)	Afternoon
X. latipes	0.183883	With (II)	Afternoon
X. caerulea	0.183883	With (II)	Afternoon
T. laeviceps	5.09858	With (I)	Morning
A. cerana	8.10758	With (I)	Morning
L. albescens	3.25975	With (I)	Morning
M. laticeps	0.334333	With (I)	Morning
X. confusa	0.12036	With (I)	Morning
X. latipes	0.132396	With (I)	Morning
X. caerulea	0.132396	With (I)	Morning
T. laeviceps	13.9584	With (I)	Morning
A. cerana	10.7822	With (I)	Morning
L. albescens	4.59708	With (I)	Morning
M. laticeps	2.08958	With (I)	Morning
X. confusa	0.835833	With (I)	Morning
X. latipes	0.367767	With (I)	Morning
X. caerulea	0.417917	With (I)	Morning
T. laeviceps	19.2242	With (I)	Morning
A. cerana	13.4569	With (I)	Morning
L. albescens	6.10158	With (I)	Morning
M. laticeps	3.17617	With (I)	Morning
X. confusa	1.08658	With (I)	Morning
X. latipes	0.835833	With (I)	Morning
X. caerulea	0.75225	With (I)	Morning
T. laeviceps	23.6541	With (I)	Noon
A. cerana	15.9644	With (I)	Noon
L. albescens	7.5225	With (I)	Noon
M. laticeps	4.17917	With (I)	Noon
X. confusa	1.42092	With (I)	Noon
X. latipes	1.25375	With (I)	Noon
X. caerulea	1.25	With (I)	Noon
T. laeviceps	28.0004	With (I)	Noon
A. cerana	20.8122	With (I)	Noon
L. albescens	8.85983	With (I)	Noon
M. laticeps	4.84783	With (I)	Noon
X. confusa	1.83883	With (I)	Noon
X. latipes	1.42092	With (I)	Noon
X. caerulea	1.41	With (I)	Noon
T. laeviceps	24.6571	With (I)	Noon
A. cerana	17.3017	With (I)	Noon
L. albescens	7.85683	With (I)	Noon
M. laticeps	4.09558	With (I)	Noon
X. confusa	1.75525	With (I)	Noon
X. latipes	1.17017	With (I)	Noon
X. caerulea	1.17017	With (I)	Noon
T. laeviceps	17.9704	With (I)	Afternoon
A. cerana	11.9524	With (I)	Afternoon
L. albescens	5.34933	With (I)	Afternoon
M. laticeps	2.75825	With (I)	Afternoon
X. confusa	1.08658	With (I)	Afternoon
X. latipes	0.585083	With (I)	Afternoon
X. caerulea	0.585083	With (I)	Afternoon
T. laeviceps	13.2062	With (I)	Afternoon
A. cerana	7.27175	With (I)	Afternoon
L. albescens	3.59408	With (I)	Afternoon
M. laticeps	2.006	With (I)	Afternoon
X. confusa	0.919417	With (I)	Afternoon
X. latipes	0.42126	With (I)	Afternoon
X. caerulea	0.42126	With (I)	Afternoon
T. laeviceps	9.19417	With (I)	Afternoon
A. cerana	4.42992	With (I)	Afternoon
L. albescens	1.83883	With (I)	Afternoon
M. laticeps	0.75225	With (I)	Afternoon
X. confusa	0.25075	With (I)	Afternoon
X. latipes	0.183883	With (I)	Afternoon
X. caerulea	0.183883	With (I)	Afternoon
T. laeviceps	5.08321	With (II)	Morning
A. cerana	8.07509	With (II)	Morning
L. albescens	3.24345	With (II)	Morning
M. laticeps	0.33233	With (II)	Morning
X. confusa	0.119758	With (II)	Morning
X. latipes	0.131734	With (II)	Morning
X. caerulea	0.131734	With (II)	Morning
T. laeviceps	13.9163	With (II)	Morning
A. cerana	10.739	With (II)	Morning
L. albescens	4.5741	With (II)	Morning
M. laticeps	2.07706	With (II)	Morning
X. confusa	0.831654	With (II)	Morning
X. latipes	0.365928	With (II)	Morning
X. caerulea	0.415827	With (II)	Morning
T. laeviceps	19.1662	With (II)	Morning
A. cerana	13.403	With (II)	Morning
L. albescens	6.07108	With (II)	Morning
M. laticeps	3.15714	With (II)	Morning
X. confusa	1.08115	With (II)	Morning
X. latipes	0.831654	With (II)	Morning
X. caerulea	0.748489	With (II)	Morning
T. laeviceps	23.5827	With (II)	Noon
A. cerana	15.9004	With (II)	Noon
L. albescens	7.48489	With (II)	Noon
M. laticeps	4.15413	With (II)	Noon
X. confusa	1.41381	With (II)	Noon
X. latipes	1.24748	With (II)	Noon
X. caerulea	1.24748	With (II)	Noon
T. laeviceps	27.916	With (II)	Noon
A. cerana	20.7288	With (II)	Noon
L. albescens	8.81553	With (II)	Noon
M. laticeps	4.81879	With (II)	Noon
X. confusa	1.82964	With (II)	Noon
X. latipes	1.41381	With (II)	Noon
X. caerulea	1.49698	With (II)	Noon
T. laeviceps	24.5827	With (II)	Noon
A. cerana	17.2324	With (II)	Noon
L. albescens	7.81755	With (II)	Noon
M. laticeps	4.07104	With (II)	Noon
X. confusa	1.74647	With (II)	Noon
X. latipes	1.16432	With (II)	Noon
X. caerulea	1.16432	With (II)	Noon
T. laeviceps	17.9162	With (II)	Afternoon
A. cerana	11.9045	With (II)	Afternoon
L. albescens	5.32259	With (II)	Afternoon
M. laticeps	2.74172	With (II)	Afternoon
X. confusa	1.08115	With (II)	Afternoon
X. latipes	0.582158	With (II)	Afternoon
X. caerulea	0.582158	With (II)	Afternoon
T. laeviceps	13.1663	With (II)	Afternoon
A. cerana	7.24261	With (II)	Afternoon
L. albescens	3.57611	With (II)	Afternoon
M. laticeps	1.99398	With (II)	Afternoon
X. confusa	0.91482	With (II)	Afternoon
X. latipes	0.419154	With (II)	Afternoon
X. caerulea	0.332662	With (II)	Afternoon
T. laeviceps	9.16644	With (II)	Afternoon
A. cerana	4.41216	With (II)	Afternoon
L. albescens	1.82964	With (II)	Afternoon
M. laticeps	0.747743	With (II)	Afternoon
X. confusa	0.249496	With (II)	Afternoon
X. latipes	0.182964	With (II)	Afternoon
X. caerulea	0.182964	With (II)	Afternoon
T. laeviceps	5.10875	With (I)	Morning
A. cerana	8.12375	With (I)	Morning
L. albescens	3.26625	With (I)	Morning
M. laticeps	0.335	With (I)	Morning
X. confusa	0.1206	With (I)	Morning
X. latipes	0.13266	With (I)	Morning
X. caerulea	0.13266	With (I)	Morning
T. laeviceps	13.9862	With (I)	Morning
A. cerana	10.8037	With (I)	Morning
L. albescens	4.60625	With (I)	Morning
M. laticeps	2.09375	With (I)	Morning
X. confusa	0.8375	With (I)	Morning
X. latipes	0.3685	With (I)	Morning
X. caerulea	0.3685	With (I)	Morning
T. laeviceps	19.2625	With (I)	Morning
A. cerana	13.4837	With (I)	Morning
L. albescens	6.11375	With (I)	Morning
M. laticeps	3.1825	With (I)	Morning
X. confusa	1.08875	With (I)	Morning
X. latipes	0.8375	With (I)	Morning
X. caerulea	0.8375	With (I)	Morning
T. laeviceps	23.7012	With (I)	Noon
A. cerana	15.9962	With (I)	Noon
L. albescens	7.5375	With (I)	Noon
M. laticeps	4.1875	With (I)	Noon
X. confusa	1.42375	With (I)	Noon
X. latipes	1.25625	With (I)	Noon
X. caerulea	1.213	With (I)	Noon
T. laeviceps	28.0563	With (I)	Noon
A. cerana	20.8537	With (I)	Noon
L. albescens	8.8775	With (I)	Noon
M. laticeps	4.8575	With (I)	Noon
X. confusa	1.8425	With (I)	Noon
X. latipes	1.42375	With (I)	Noon
X. caerulea	1.42375	With (I)	Noon
T. laeviceps	24.7062	With (I)	Noon
A. cerana	17.3362	With (I)	Noon
L. albescens	7.8725	With (I)	Noon
M. laticeps	4.10375	With (I)	Noon
X. confusa	1.75875	With (I)	Noon
X. latipes	1.1725	With (I)	Noon
X. caerulea	1.1725	With (I)	Noon
T. laeviceps	18.0062	With (I)	Afternoon
A. cerana	11.9762	With (I)	Afternoon
L. albescens	5.36	With (I)	Afternoon
M. laticeps	2.76375	With (I)	Afternoon
X. confusa	1.08875	With (I)	Afternoon
X. latipes	0.58625	With (I)	Afternoon
X. caerulea	0.58625	With (I)	Afternoon
T. laeviceps	13.2325	With (I)	Afternoon
A. cerana	7.28625	With (I)	Afternoon
L. albescens	3.60125	With (I)	Afternoon
M. laticeps	2.01	With (I)	Afternoon
X. confusa	0.92125	With (I)	Afternoon
X. latipes	0.4221	With (I)	Afternoon
X. caerulea	0.4221	With (I)	Afternoon
T. laeviceps	9.2125	With (I)	Afternoon
A. cerana	4.43875	With (I)	Afternoon
L. albescens	1.8425	With (I)	Afternoon
M. laticeps	0.75375	With (I)	Afternoon
X. confusa	0.25125	With (I)	Afternoon
X. latipes	0.18425	With (I)	Afternoon
X. caerulea	0.18475	With (I)	Afternoon
T. laeviceps	5.09853	With (II)	Morning
A. cerana	8.09944	With (II)	Morning
L. albescens	3.25323	With (II)	Morning
M. laticeps	0.333332	With (II)	Morning
X. confusa	0.120119	With (II)	Morning
X. latipes	0.132131	With (II)	Morning
X. caerulea	0.132131	With (II)	Morning
T. laeviceps	13.9583	With (II)	Morning
A. cerana	10.7714	With (II)	Morning
L. albescens	4.58789	With (II)	Morning
M. laticeps	2.08333	With (II)	Morning
X. confusa	0.834162	With (II)	Morning
X. latipes	0.367031	With (II)	Morning
X. caerulea	0.417081	With (II)	Morning
T. laeviceps	19.224	With (II)	Morning
A. cerana	13.4434	With (II)	Morning
L. albescens	6.08938	With (II)	Morning
M. laticeps	3.16665	With (II)	Morning
X. confusa	1.08441	With (II)	Morning
X. latipes	0.834162	With (II)	Morning
X. caerulea	0.750745	With (II)	Morning
T. laeviceps	23.6538	With (II)	Noon
A. cerana	15.9484	With (II)	Noon
L. albescens	7.50745	With (II)	Noon
M. laticeps	4.16665	With (II)	Noon
X. confusa	1.41807	With (II)	Noon
X. latipes	1.25124	With (II)	Noon
X. caerulea	1.25124	With (II)	Noon
T. laeviceps	28.0001	With (II)	Noon
A. cerana	20.7913	With (II)	Noon
L. albescens	8.84211	With (II)	Noon
M. laticeps	4.83331	With (II)	Noon
X. confusa	1.83516	With (II)	Noon
X. latipes	1.41807	With (II)	Noon
X. caerulea	1.50149	With (II)	Noon
T. laeviceps	24.6568	With (II)	Noon
A. cerana	17.2844	With (II)	Noon
L. albescens	7.84112	With (II)	Noon
M. laticeps	4.08332	With (II)	Noon
X. confusa	1.75174	With (II)	Noon
X. latipes	1.16783	With (II)	Noon
X. caerulea	1.16783	With (II)	Noon
T. laeviceps	17.9702	With (II)	Afternoon
A. cerana	11.9404	With (II)	Afternoon
L. albescens	5.33863	With (II)	Afternoon
M. laticeps	2.74999	With (II)	Afternoon
X. confusa	1.08441	With (II)	Afternoon
X. latipes	0.583913	With (II)	Afternoon
X. caerulea	0.583913	With (II)	Afternoon
T. laeviceps	13.206	With (II)	Afternoon
A. cerana	7.26444	With (II)	Afternoon
L. albescens	3.5869	With (II)	Afternoon
M. laticeps	1.99999	With (II)	Afternoon
X. confusa	0.917578	With (II)	Afternoon
X. latipes	0.420417	With (II)	Afternoon
X. caerulea	0.333665	With (II)	Afternoon
T. laeviceps	9.19407	With (II)	Afternoon
A. cerana	4.42546	With (II)	Afternoon
L. albescens	1.83516	With (II)	Afternoon
M. laticeps	0.749997	With (II)	Afternoon
X. confusa	0.250248	With (II)	Afternoon
X. latipes	0.183516	With (II)	Afternoon
X. caerulea	0.183516	With (II)	Afternoon
T. laeviceps	5.05792	With (I)	Morning
A. cerana	8.04292	With (I)	Morning
L. albescens	3.23375	With (I)	Morning
M. laticeps	0.331667	With (I)	Morning
X. confusa	0.1194	With (I)	Morning
X. latipes	0.13134	With (I)	Morning
X. caerulea	0.13134	With (I)	Morning
T. laeviceps	13.8471	With (I)	Morning
A. cerana	10.6962	With (I)	Morning
L. albescens	4.56042	With (I)	Morning
M. laticeps	2.07292	With (I)	Morning
X. confusa	0.829167	With (I)	Morning
X. latipes	0.364833	With (I)	Morning
X. caerulea	0.364583	With (I)	Morning
T. laeviceps	19.0708	With (I)	Morning
A. cerana	13.3496	With (I)	Morning
L. albescens	6.05292	With (I)	Morning
M. laticeps	3.15083	With (I)	Morning
X. confusa	1.07792	With (I)	Morning
X. latipes	0.829167	With (I)	Morning
X. caerulea	0.83625	With (I)	Morning
T. laeviceps	23.4654	With (I)	Noon
A. cerana	15.8371	With (I)	Noon
L. albescens	7.4625	With (I)	Noon
M. laticeps	4.14583	With (I)	Noon
X. confusa	1.40958	With (I)	Noon
X. latipes	1.24375	With (I)	Noon
X. caerulea	1.24	With (I)	Noon
T. laeviceps	27.7771	With (I)	Noon
A. cerana	20.6462	With (I)	Noon
L. albescens	8.78917	With (I)	Noon
M. laticeps	4.80917	With (I)	Noon
X. confusa	1.82417	With (I)	Noon
X. latipes	1.40958	With (I)	Noon
X. caerulea	1.4215	With (I)	Noon
T. laeviceps	24.4604	With (I)	Noon
A. cerana	17.1638	With (I)	Noon
L. albescens	7.79417	With (I)	Noon
M. laticeps	4.06292	With (I)	Noon
X. confusa	1.74125	With (I)	Noon
X. latipes	1.31608	With (I)	Noon
X. caerulea	1.32667	With (I)	Noon
T. laeviceps	17.8271	With (I)	Afternoon
A. cerana	11.8571	With (I)	Afternoon
L. albescens	5.30667	With (I)	Afternoon
M. laticeps	2.73625	With (I)	Afternoon
X. confusa	2.07792	With (I)	Afternoon
X. latipes	0.580417	With (I)	Afternoon
X. caerulea	0.580417	With (I)	Afternoon
T. laeviceps	13.1008	With (I)	Afternoon
A. cerana	7.21375	With (I)	Afternoon
L. albescens	3.56542	With (I)	Afternoon
M. laticeps	1.99	With (I)	Afternoon
X. confusa	0.912083	With (I)	Afternoon
X. latipes	0.4179	With (I)	Afternoon
X. caerulea	0.431667	With (I)	Afternoon
T. laeviceps	9.12083	With (I)	Afternoon
A. cerana	4.39458	With (I)	Afternoon
L. albescens	1.82417	With (I)	Afternoon
M. laticeps	0.74625	With (I)	Afternoon
X. confusa	0.2875	With (I)	Afternoon
X. latipes	0.18	With (I)	Afternoon
X. caerulea	0.18	With (I)	Afternoon
T. laeviceps	5.12408	With (II)	Morning
A. cerana	8.14001	With (II)	Morning
L. albescens	3.26953	With (II)	Morning
M. laticeps	0.335002	With (II)	Morning
X. confusa	0.120721	With (II)	Morning
X. latipes	0.132793	With (II)	Morning
X. caerulea	0.132793	With (II)	Morning
T. laeviceps	14.0282	With (II)	Morning
A. cerana	10.8254	With (II)	Morning
L. albescens	4.61087	With (II)	Morning
M. laticeps	2.09376	With (II)	Morning
X. confusa	0.838341	With (II)	Morning
X. latipes	0.36887	With (II)	Morning
X. caerulea	0.41917	With (II)	Morning
T. laeviceps	19.3203	With (II)	Morning
A. cerana	13.5107	With (II)	Morning
L. albescens	6.11989	With (II)	Morning
M. laticeps	3.18252	With (II)	Morning
X. confusa	1.08984	With (II)	Morning
X. latipes	0.838341	With (II)	Morning
X. caerulea	0.754507	With (II)	Morning
T. laeviceps	23.7724	With (II)	Noon
A. cerana	16.0283	With (II)	Noon
L. albescens	7.54507	With (II)	Noon
M. laticeps	4.18752	With (II)	Noon
X. confusa	1.42518	With (II)	Noon
X. latipes	1.25751	With (II)	Noon
X. caerulea	1.25751	With (II)	Noon
T. laeviceps	28.1404	With (II)	Noon
A. cerana	20.8955	With (II)	Noon
L. albescens	8.88641	With (II)	Noon
M. laticeps	4.85753	With (II)	Noon
X. confusa	1.84435	With (II)	Noon
X. latipes	1.42518	With (II)	Noon
X. caerulea	1.50901	With (II)	Noon
T. laeviceps	24.7804	With (II)	Noon
A. cerana	17.371	With (II)	Noon
L. albescens	7.8804	With (II)	Noon
M. laticeps	4.10377	With (II)	Noon
X. confusa	1.76052	With (II)	Noon
X. latipes	1.17368	With (II)	Noon
X. caerulea	1.17368	With (II)	Noon
T. laeviceps	18.0603	With (II)	Afternoon
A. cerana	12.0002	With (II)	Afternoon
L. albescens	5.36538	With (II)	Afternoon
M. laticeps	2.76377	With (II)	Afternoon
X. confusa	1.08984	With (II)	Afternoon
X. latipes	0.586839	With (II)	Afternoon
X. caerulea	0.586839	With (II)	Afternoon
T. laeviceps	13.2722	With (II)	Afternoon
A. cerana	7.30084	With (II)	Afternoon
L. albescens	3.60487	With (II)	Afternoon
M. laticeps	2.01001	With (II)	Afternoon
X. confusa	0.922175	With (II)	Afternoon
X. latipes	0.422524	With (II)	Afternoon
X. caerulea	0.335336	With (II)	Afternoon
T. laeviceps	9.24014	With (II)	Afternoon
A. cerana	4.44764	With (II)	Afternoon
L. albescens	1.84435	With (II)	Afternoon
M. laticeps	0.753754	With (II)	Afternoon
X. confusa	0.251502	With (II)	Afternoon
X. latipes	0.184435	With (II)	Afternoon
X. caerulea	0.184435	With (II)	Afternoon

## Sheet: Pollination efficacy
Pollination efficacy on fruit set, fruit weight, and yield
Fruit set	Fruit weight	Yield	Treatment
60	142.45	858.3	without meliponiculture (I)
60	142.35	857.7	without meliponiculture (I)
60	142.25	857.1	without meliponiculture (I)
60	142.15	856.5	without meliponiculture (I)
60	142.05	855.9	without meliponiculture (I)
60	141.95	852.3	without meliponiculture (I)
60	141.85	852.9	without meliponiculture (I)
60	141.75	853.5	without meliponiculture (I)
60	140.85	854.1	without meliponiculture (I)
60	140.95	854.7	without meliponiculture (I)
60	141.05	855.3	without meliponiculture (I)
60	141.15	858.9	without meliponiculture (I)
60	141.25	859.5	without meliponiculture (I)
60	141.35	860.1	without meliponiculture (I)
60	140.65	860.7	without meliponiculture (I)
60	140.75	861.3	without meliponiculture (I)
60	141.45	861.9	without meliponiculture (I)
66.6667	141.55	862.5	without meliponiculture (I)
66.6667	141.65	863.1	without meliponiculture (I)
66.6667	140.55	851.7	without meliponiculture (I)
66.6667	140.45	851.1	without meliponiculture (I)
66.6667	140.35	850.5	without meliponiculture (I)
66.6667	140.25	849.9	without meliponiculture (I)
66.6667	143.75	849.3	without meliponiculture (I)
66.6667	143.65	848.7	without meliponiculture (I)
66.6667	143.55	838.5	without meliponiculture (I)
66.6667	143.45	839.1	without meliponiculture (I)
66.6667	143.35	839.7	without meliponiculture (I)
66.6667	143.25	840.3	without meliponiculture (I)
66.6667	143.15	840.9	without meliponiculture (I)
66.6667	140.15	841.5	without meliponiculture (I)
66.6667	140.05	842.1	without meliponiculture (I)
66.6667	139.95	842.7	without meliponiculture (I)
60	139.85	848.1	without meliponiculture (I)
60	139.75	847.5	without meliponiculture (I)
60	139.65	846.9	without meliponiculture (I)
60	139.55	846.3	without meliponiculture (I)
60	143.85	845.7	without meliponiculture (I)
60	143.05	845.1	without meliponiculture (I)
60	142.95	844.5	without meliponiculture (I)
60	142.85	843.9	without meliponiculture (I)
60	142.75	843.3	without meliponiculture (I)
60	142.65	837.9	without meliponiculture (I)
60	142.55	837.3	without meliponiculture (I)
60	139.45	836.7	without meliponiculture (I)
60	139.35	836.1	without meliponiculture (I)
60	139.25	835.5	without meliponiculture (I)
60	139.15	834.9	without meliponiculture (I)
60	139.05	834.3	without meliponiculture (I)
60	138.95	833.7	without meliponiculture (I)
60	138.85	833.1	without meliponiculture (I)
60	138.75	832.5	without meliponiculture (I)
60	138.05	825.3	without meliponiculture (I)
60	138.15	825.9	without meliponiculture (I)
60	138.25	826.5	without meliponiculture (I)
60	138.35	827.1	without meliponiculture (I)
60	138.45	827.7	without meliponiculture (I)
60	138.55	828.3	without meliponiculture (I)
60	138.65	828.9	without meliponiculture (I)
60	137.95	829.5	without meliponiculture (I)
60	137.85	830.1	without meliponiculture (I)
60	137.75	830.7	without meliponiculture (I)
60	137.55	831.3	without meliponiculture (I)
60	137.65	831.9	without meliponiculture (I)
73.3333	152.65	1197.2	with meliponiculture (I)
73.3333	151.6	1198.4	with meliponiculture (I)
73.3333	151.75	1199.6	with meliponiculture (I)
73.3333	151.9	1200.8	with meliponiculture (I)
73.3333	152.05	1202	with meliponiculture (I)
73.3333	152.2	1203.2	with meliponiculture (I)
73.3333	152.35	1196	with meliponiculture (I)
73.3333	152.5	1194.8	with meliponiculture (I)
73.3333	151.45	1193.6	with meliponiculture (I)
73.3333	151.3	1192.4	with meliponiculture (I)
73.3333	151.15	1191.2	with meliponiculture (I)
73.3333	149.95	1190	with meliponiculture (I)
73.3333	150.1	1188.8	with meliponiculture (I)
73.3333	150.25	1221.2	with meliponiculture (I)
73.3333	150.4	1220	with meliponiculture (I)
80	150.55	1218.8	with meliponiculture (I)
80	150.7	1217.6	with meliponiculture (I)
80	150.85	1216.4	with meliponiculture (I)
80	147.55	1215.2	with meliponiculture (I)
80	147.7	1214	with meliponiculture (I)
80	147.85	1212.8	with meliponiculture (I)
80	148	1211.6	with meliponiculture (I)
80	148.15	1210.4	with meliponiculture (I)
80	148.3	1209.2	with meliponiculture (I)
80	148.45	1208	with meliponiculture (I)
80	148.6	1206.8	with meliponiculture (I)
80	148.75	1205.6	with meliponiculture (I)
80	148.9	1204.4	with meliponiculture (I)
80	149.65	1187.6	with meliponiculture (I)
80	149.8	1186.4	with meliponiculture (I)
80	151	1185.2	with meliponiculture (I)
80	149.5	1184	with meliponiculture (I)
80	149.35	1182.8	with meliponiculture (I)
80	149.2	1181.6	with meliponiculture (I)
80	149.05	1180.4	with meliponiculture (I)
80	147.4	1167.2	with meliponiculture (I)
80	147.25	1168.4	with meliponiculture (I)
80	147.1	1169.6	with meliponiculture (I)
80	146.95	1170.8	with meliponiculture (I)
80	146.8	1172	with meliponiculture (I)
80	146.65	1173.2	with meliponiculture (I)
80	146.5	1174.4	with meliponiculture (I)
80	146.35	1175.6	with meliponiculture (I)
73.3333	146.2	1176.8	with meliponiculture (I)
73.3333	146.05	1178	with meliponiculture (I)
73.3333	145.9	1179.2	with meliponiculture (I)
73.3333	145.75	1166	with meliponiculture (I)
73.3333	145.6	1164.8	with meliponiculture (I)
73.3333	143.65	1163.6	with meliponiculture (I)
73.3333	143.8	1162.4	with meliponiculture (I)
73.3333	143.95	1161.2	with meliponiculture (I)
73.3333	144.1	1160	with meliponiculture (I)
73.3333	144.25	1158.8	with meliponiculture (I)
73.3333	144.4	1157.6	with meliponiculture (I)
73.3333	144.55	1156.4	with meliponiculture (I)
73.3333	144.7	1148	with meliponiculture (I)
73.3333	144.85	1149.2	with meliponiculture (I)
73.3333	145	1150.4	with meliponiculture (I)
73.3333	145.15	1151.6	with meliponiculture (I)
73.3333	145.3	1152.8	with meliponiculture (I)
73.3333	145.45	1154	with meliponiculture (I)
73.3333	143.5	1155.2	with meliponiculture (I)
73.3333	143.35	1146.8	with meliponiculture (I)
73.3333	143.2	1145.6	with meliponiculture (I)
73.3333	143.15	1164.4	with meliponiculture (II)
73.3333	143.3	1165.6	with meliponiculture (II)
73.3333	143.45	1166.8	with meliponiculture (II)
73.3333	143.6	1168	with meliponiculture (II)
73.3333	143.75	1169.2	with meliponiculture (II)
73.3333	143.9	1170.4	with meliponiculture (II)
73.3333	144.05	1171.6	with meliponiculture (II)
73.3333	144.2	1172.8	with meliponiculture (II)
73.3333	144.35	1174	with meliponiculture (II)
73.3333	151.25	1175.2	with meliponiculture (II)
73.3333	151.1	1192	with meliponiculture (II)
73.3333	150.95	1207.6	with meliponiculture (II)
73.3333	150.8	1206.4	with meliponiculture (II)
73.3333	150.65	1205.2	with meliponiculture (II)
73.3333	150.5	1204	with meliponiculture (II)
73.3333	150.35	1202.8	with meliponiculture (II)
73.3333	150.2	1201.6	with meliponiculture (II)
73.3333	150.05	1200.4	with meliponiculture (II)
73.3333	149.9	1199.2	with meliponiculture (II)
73.3333	149.75	1198	with meliponiculture (II)
73.3333	149.6	1196.8	with meliponiculture (II)
73.3333	149.45	1195.6	with meliponiculture (II)
73.3333	148.85	1194.4	with meliponiculture (II)
73.3333	149	1193.2	with meliponiculture (II)
73.3333	149.15	1187.2	with meliponiculture (II)
73.3333	149.3	1190.8	with meliponiculture (II)
73.3333	148.7	1189.6	with meliponiculture (II)
73.3333	148.55	1188.4	with meliponiculture (II)
73.3333	148.4	1176.4	with meliponiculture (II)
80	148.25	1177.6	with meliponiculture (II)
80	148.1	1178.8	with meliponiculture (II)
80	147.05	1180	with meliponiculture (II)
80	147.2	1181.2	with meliponiculture (II)
80	147.35	1182.4	with meliponiculture (II)
80	147.5	1183.6	with meliponiculture (II)
80	147.65	1184.8	with meliponiculture (II)
80	147.8	1186	with meliponiculture (II)
80	147.95	1208.8	with meliponiculture (II)
80	146.9	1210	with meliponiculture (II)
80	146.75	1211.2	with meliponiculture (II)
80	146.6	1212.4	with meliponiculture (II)
80	146.45	1213.6	with meliponiculture (II)
80	145.85	1214.8	with meliponiculture (II)
80	146	1216	with meliponiculture (II)
80	146.15	1217.2	with meliponiculture (II)
80	146.3	1218.4	with meliponiculture (II)
80	151.4	1219.6	with meliponiculture (II)
80	151.55	1220.8	with meliponiculture (II)
80	151.7	1163.2	with meliponiculture (II)
80	151.85	1147.6	with meliponiculture (II)
80	152	1146.4	with meliponiculture (II)
80	152.15	1145.2	with meliponiculture (II)
80	152.3	1153.6	with meliponiculture (II)
80	152.45	1152.4	with meliponiculture (II)
80	152.6	1151.2	with meliponiculture (II)
80	145.7	1150	with meliponiculture (II)
80	145.55	1148.8	with meliponiculture (II)
80	145.4	1162	with meliponiculture (II)
80	145.25	1160.8	with meliponiculture (II)
80	145.1	1159.6	with meliponiculture (II)
80	144.95	1158.4	with meliponiculture (II)
80	144.8	1157.2	with meliponiculture (II)
80	144.65	1156	with meliponiculture (II)
80	144.5	1154.8	with meliponiculture (II)

## Sheet: Principal component analysis
Principal component analysis between environmental factors and number of pollinators
Light intensity	Temperature	Relative humidity	Volume of nectar	Concentration of nectar	Number of pollinators	Time
1632.2	20.34	87.425	6.47	28.62	16	Morning
2213.9	21.633	83.169	7.13	29.17	26.25	Morning
3354.5	22.724	79.193	7.55	30.53	37.14	Morning
4493.5	23.258	75.514	8.18	31.98	49.7292	Noon
5442.5	24.291	72.211	8.83	32.87	56.3542	Noon
3834.2	23.93	71.953	5.37	33.08	48.5625	Noon
2792.3	22.428	74.476	4.91	33.12	31.8333	Afternoon
1170.7	22.25	82.185	3.24	33.28	22.375	Afternoon
589.3	20.269	85.442	2.86	33.33	11.9792	Afternoon
1681.17	20.4417	83.0537	6.7935	28.9062	20.8	Morning
2280.32	21.7412	79.0105	7.4865	29.4617	34.125	Morning
3455.14	22.8376	75.2334	7.9275	30.8353	48.282	Morning
4628.31	23.3743	71.7383	8.589	32.2998	64.6479	Noon
5605.78	24.4125	68.6004	9.2715	33.1987	73.2604	Noon
3949.23	24.0496	68.3554	5.6385	33.4108	63.1313	Noon
2876.07	22.5401	70.7522	5.1555	33.4512	41.3833	Afternoon
1205.82	22.3612	78.0757	3.402	33.6128	29.0875	Afternoon
606.979	20.3703	81.1699	3.003	33.6633	15.5729	Afternoon
1648.52	20.5027	78.6825	6.7288	28.6486	15.2	Morning
2236.04	21.8061	74.8521	7.4152	29.1992	24.9375	Morning
3388.05	22.9058	71.2737	7.852	30.5605	35.283	Morning
4538.44	23.4441	67.9626	8.5072	32.012	47.2427	Noon
5496.93	24.4853	64.9899	9.1832	32.9029	53.5365	Noon
3872.54	24.1214	64.7577	5.5848	33.1131	46.1344	Noon
2820.22	22.6074	67.0284	5.1064	33.1531	30.2417	Afternoon
1182.41	22.428	73.9665	3.3696	33.3133	21.2562	Afternoon
595.193	20.4312	76.8978	2.9744	33.3633	11.3802	Afternoon
1468.98	21.357	91.7963	6.6641	28.5914	13.6	Morning
1992.51	22.7146	87.3274	7.3439	29.1408	22.3125	Morning
3019.05	23.8602	83.1526	7.7765	30.4995	31.569	Morning
4044.15	24.4209	79.2897	8.4254	31.948	42.2698	Noon
4898.25	25.5056	75.8216	9.0949	32.8371	47.901	Noon
3450.78	25.1265	75.5507	5.5311	33.0469	41.2781	Noon
2513.07	23.5494	78.1998	5.0573	33.0869	27.0583	Afternoon
1053.63	23.3625	86.2943	3.3372	33.2467	19.0188	Afternoon
530.37	21.2825	89.7141	2.9458	33.2967	10.1823	Afternoon
1550.59	21.1536	95.1184	5.823	28.4769	16.8	Morning
2103.2	22.4983	90.4879	6.417	29.0242	27.5625	Morning
3186.77	23.633	86.162	6.795	30.3773	38.997	Morning
4268.82	24.1883	82.1592	7.362	31.8201	52.2156	Noon
5170.38	25.2626	78.5656	7.947	32.7056	59.1719	Noon
3642.49	24.8872	78.2849	4.833	32.9146	50.9906	Noon
2652.68	23.3251	81.0299	4.419	32.9544	33.425	Afternoon
1112.16	23.14	89.4173	2.916	33.1136	23.4938	Afternoon
559.835	21.0798	92.9609	2.574	33.1634	12.5781	Afternoon
1713.81	22.1706	86.2885	6.8582	28.8776	21.6	Morning
2324.6	23.58	82.0878	7.5578	29.4325	35.4375	Morning
3522.23	24.7692	78.1635	8.003	30.8048	50.139	Morning
4718.18	25.3512	74.5323	8.6708	32.2678	67.1344	Noon
5714.62	26.4772	71.2723	9.3598	33.1658	76.0781	Noon
4025.91	26.0837	71.0176	5.6922	33.3777	65.5594	Noon
2931.92	24.4465	73.5078	5.2046	33.4181	42.975	Afternoon
1229.24	24.2525	81.1166	3.4344	33.5795	30.2063	Afternoon
618.765	22.0932	84.3313	3.0316	33.63	16.1719	Afternoon
1664.84	21.7638	82.6166	6.6641	30.051	15.84	Morning
2258.18	23.1473	78.5947	7.3439	30.6285	25.9875	Morning
3421.59	24.3147	74.8374	7.7765	32.0565	36.7686	Morning
4583.37	24.8861	71.3607	8.4254	33.579	49.2319	Noon
5551.35	25.9914	68.2394	9.0949	34.5135	55.7906	Noon
3910.88	25.6051	67.9956	5.5311	34.734	48.0769	Noon
2848.15	23.998	70.3798	5.0573	34.776	31.515	Afternoon
1194.11	23.8075	77.6648	3.3372	34.944	22.1513	Afternoon
601.086	21.6878	80.7427	2.9458	34.9965	11.8594	Afternoon
1387.37	19.7298	87.8621	5.4995	29.1924	12.8	Morning
1881.82	20.984	83.5848	6.0605	29.7534	21	Morning
2851.32	22.0423	79.589	6.4175	31.1406	29.712	Morning
3819.47	22.5603	75.8916	6.953	32.6196	39.7833	Noon
4626.12	23.5623	72.5721	7.5055	33.5274	45.0833	Noon
3259.07	23.2121	72.3128	4.5645	33.7416	38.85	Noon
2373.45	21.7552	74.8484	4.1735	33.7824	25.4667	Afternoon
995.095	21.5825	82.5959	2.754	33.9456	17.9	Afternoon
500.905	19.6609	85.8692	2.431	33.9966	9.58333	Afternoon

## Sheet: Correlation data
Environmental factors with number of pollinators								Monthly population with number of pollinators
Light intensity	Temperature	Relative humidity	Volume of nectar	Concentration of nectar	Number of pollinators			Month	Number of flowers	Number of pollinators
1632.2	20.34	87.425	6.47	28.62	16			March	929.75	476.5
2213.9	21.633	83.169	7.13	29.17	26.25			April	1197	819.75
3354.5	22.724	79.193	7.55	30.53	37.14			May	382.5	272
4493.5	23.258	75.514	8.18	31.98	49.7292			June	178	119
5442.5	24.291	72.211	8.83	32.87	56.3542			July	745	484
3834.2	23.93	71.953	5.37	33.08	48.5625			August	1234	868
2792.3	22.428	74.476	4.91	33.12	31.8333			September	456	271
1170.7	22.25	82.185	3.24	33.28	22.375			October	153	127
589.3	20.269	85.442	2.86	33.33	11.9792
1681.17	20.4417	83.0537	6.7935	28.9062	20.8
2280.32	21.7412	79.0105	7.4865	29.4617	34.125
3455.14	22.8376	75.2334	7.9275	30.8353	48.282
4628.31	23.3743	71.7383	8.589	32.2998	64.6479
5605.78	24.4125	68.6004	9.2715	33.1987	73.2604
3949.23	24.0496	68.3554	5.6385	33.4108	63.1313
2876.07	22.5401	70.7522	5.1555	33.4512	41.3833
1205.82	22.3612	78.0757	3.402	33.6128	29.0875
606.979	20.3703	81.1699	3.003	33.6633	15.5729
1648.52	20.5027	78.6825	6.7288	28.6486	15.2
2236.04	21.8061	74.8521	7.4152	29.1992	24.9375
3388.05	22.9058	71.2737	7.852	30.5605	35.283
4538.44	23.4441	67.9626	8.5072	32.012	47.2427
5496.93	24.4853	64.9899	9.1832	32.9029	53.5365
3872.54	24.1214	64.7577	5.5848	33.1131	46.1344
2820.22	22.6074	67.0284	5.1064	33.1531	30.2417
1182.41	22.428	73.9665	3.3696	33.3133	21.2562
595.193	20.4312	76.8978	2.9744	33.3633	11.3802
1468.98	21.357	91.7963	6.6641	28.5914	13.6
1992.51	22.7146	87.3274	7.3439	29.1408	22.3125
3019.05	23.8602	83.1526	7.7765	30.4995	31.569
4044.15	24.4209	79.2897	8.4254	31.948	42.2698
4898.25	25.5056	75.8216	9.0949	32.8371	47.901
3450.78	25.1265	75.5507	5.5311	33.0469	41.2781
2513.07	23.5494	78.1998	5.0573	33.0869	27.0583
1053.63	23.3625	86.2943	3.3372	33.2467	19.0188
530.37	21.2825	89.7141	2.9458	33.2967	10.1823
1550.59	21.1536	95.1184	5.823	28.4769	16.8
2103.2	22.4983	90.4879	6.417	29.0242	27.5625
3186.77	23.633	86.162	6.795	30.3773	38.997
4268.82	24.1883	82.1592	7.362	31.8201	52.2156
5170.38	25.2626	78.5656	7.947	32.7056	59.1719
3642.49	24.8872	78.2849	4.833	32.9146	50.9906
2652.68	23.3251	81.0299	4.419	32.9544	33.425
1112.16	23.14	89.4173	2.916	33.1136	23.4938
559.835	21.0798	92.9609	2.574	33.1634	12.5781
1713.81	22.1706	86.2885	6.8582	28.8776	21.6
2324.6	23.58	82.0878	7.5578	29.4325	35.4375
3522.23	24.7692	78.1635	8.003	30.8048	50.139
4718.18	25.3512	74.5323	8.6708	32.2678	67.1344
5714.62	26.4772	71.2723	9.3598	33.1658	76.0781
4025.91	26.0837	71.0176	5.6922	33.3777	65.5594
2931.92	24.4465	73.5078	5.2046	33.4181	42.975
1229.24	24.2525	81.1166	3.4344	33.5795	30.2063
618.765	22.0932	84.3313	3.0316	33.63	16.1719
1664.84	21.7638	82.6166	6.6641	30.051	15.84
2258.18	23.1473	78.5947	7.3439	30.6285	25.9875
3421.59	24.3147	74.8374	7.7765	32.0565	36.7686
4583.37	24.8861	71.3607	8.4254	33.579	49.2319
5551.35	25.9914	68.2394	9.0949	34.5135	55.7906
3910.88	25.6051	67.9956	5.5311	34.734	48.0769
2848.15	23.998	70.3798	5.0573	34.776	31.515
1194.11	23.8075	77.6648	3.3372	34.944	22.1513
601.086	21.6878	80.7427	2.9458	34.9965	11.8594
1387.37	19.7298	87.8621	5.4995	29.1924	12.8
1881.82	20.984	83.5848	6.0605	29.7534	21
2851.32	22.0423	79.589	6.4175	31.1406	29.712
3819.47	22.5603	75.8916	6.953	32.6196	39.7833
4626.12	23.5623	72.5721	7.5055	33.5274	45.0833
3259.07	23.2121	72.3128	4.5645	33.7416	38.85
2373.45	21.7552	74.8484	4.1735	33.7824	25.4667
995.095	21.5825	82.5959	2.754	33.9456	17.9
500.905	19.6609	85.8692	2.431	33.9966	9.58333
